# Supplementary material
Source: HighWire-hosted journal article supplement (https://bmjpaedsopen.bmj.com/content/7/1/e002094)
Supplement: inline-supplementary-material-1 [file inline-supplementary-material-1.pdf]

## Supplemental Materials

### Supplemental Materials 1

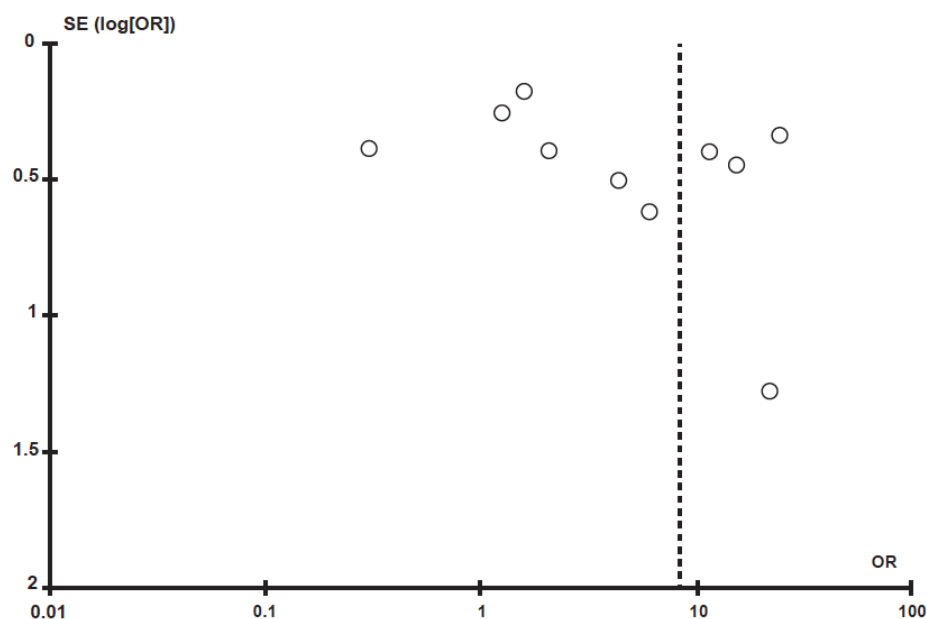

Supplemental Materials 1 I. Funnel plot of comparison of the risk of death in patients with fluid overload

### Supplemental Material 2

Sensitivity analysis for risk of mortality and the presence of fluid overload.

| Comparasion                                                                                        | With fluid Overload | Without fluid overload | OR (95% IC)       | P value | I <sup>2</sup> (%) |
|----------------------------------------------------------------------------------------------------|---------------------|------------------------|-------------------|---------|--------------------|
| Sample size <150 <sup>5,9,29</sup> vs n>150 <sup>6,10,11,14-16)</sup>                              | 59/114              | 39/239                 | 7.74 (3.43-17.47) | <0.01   | 47                 |
| Statistical model (fixed vs random effects)                                                        | 419/907             | 369/1405               | 4.73 (3.79-5.91)  | <0.01   | 94                 |
| Methodologic quality (low risk <sup>14,15,29</sup> vs high risk of bias <sup>5,6,9,10,11,16)</sup> | 41/83               | 35/233                 | 9.46 (4.86-18.40) | <0.01   | 0                  |
|                                                                                                    | 367/699             | 310/1073               | 6.88 (2.09-22.67) | 0.02    | 94                 |
